# Supplementary material
Source: PubMed Central journal article supplement (PMC4446247)
Supplement: NIHMS652520-supplement.pdf [file NIHMS652520-supplement.pdf]

## Aberrant Cortical Morphometry in the 22q11.2 Deletion Syndrome

### Supplemental Information

**Table S1.** Demographic characteristics of subgroup of 22q11DS patients with psychotic symptoms and their demographically matched controls.

|          | <b>22q11DS</b>                                | <b>ND-TD</b>                                   | <b>ND-PS</b>                                  | <b><i>p</i>-value</b> |
|----------|-----------------------------------------------|------------------------------------------------|-----------------------------------------------|-----------------------|
| <i>n</i> | 30                                            | 30                                             | 30                                            |                       |
| Age      | 19.2 (3.7)<br>13.4-29.8                       | 17.8 (2.8)<br>13.3-21.8                        | 17.5 (2.6)<br>13.3-21.3                       | 0.16                  |
| Gender   | 18 M (60%)<br>12 F (40%)                      | 18 M (60%)<br>12 F (40%)                       | 18 M (60%)<br>12 F (40%)                      | 1                     |
| Race     | 24 White (80%)<br>3 AA (10%)<br>3 Other (10%) | 17 White (57%)<br>10 AA (33%)<br>3 Other (10%) | 21 White (70%)<br>6 AA (20%)<br>3 Other (10%) | 0.27                  |

AA, African American; F, female; M, male; ND, nondeleted; PS, psychotic symptoms; TD, typically developing. *P*-values are based on ANOVA for age and chi-square test for categorical variables.

**Table S2.** Characteristics of 22q11DS sample when split by psychotic symptoms. Differences in demographic characteristics were controlled statistically in subsequent analyses.

|                   | <b>Without Psychosis</b>                     | <b>Psychotic Symptoms</b>                     | <b>p-value</b> |
|-------------------|----------------------------------------------|-----------------------------------------------|----------------|
| <i>n</i>          | 23                                           | 30                                            |                |
| Age               | 21.5 (3.9)<br>13.3-28.6                      | 19.2 (4.7)<br>13.4-29.7                       | 0.05           |
| Gender            | 9 M (39%)<br>14 F (61%)                      | 18 M (60%)<br>12 F (40%)                      | 0.14           |
| Race              | 19 White (82%)<br>4 AA (17%)<br>0 Other (0%) | 24 White (80%)<br>3 AA (10%)<br>3 Other (10%) | 0.41           |
| Psychosis*        | 0 (0%)                                       | 3 (10%)                                       | 0.24           |
| Mood Disorders    | 12 (52%)                                     | 4 (13%)                                       | 0.01           |
| ADHD              | 7 (30%)                                      | 11 (36%)                                      | 0.57           |
| Anxiety Disorders | 8 (34%)                                      | 14 (47%)                                      | 0.28           |

AA, African American; ADHD, attention-deficit/hyperactivity disorder; F, female; M, male.

*P*-values are based on ANOVA for age and chi-square test for categorical variables.

\*One patient with schizophrenia, one with schizoaffective disorder, and one with major depression with psychotic features. 27 subjects with 22q11DS were classified as prodromal based on clinical diagnosis.

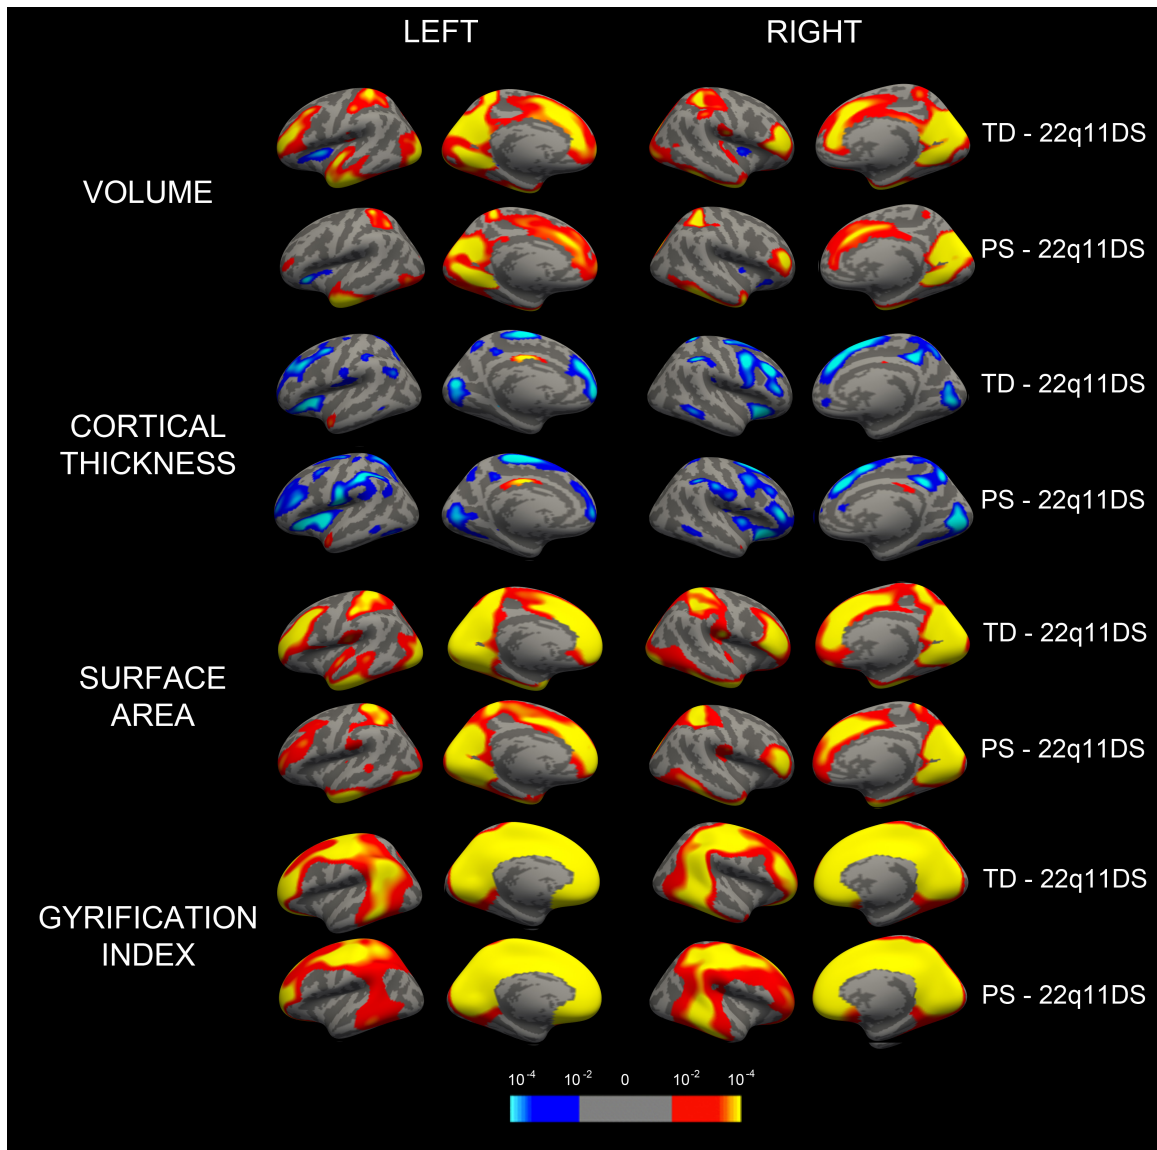

**Figure S1.** Subgroup analysis examining group differences between subjects with 22q11DS and psychotic symptoms compared to typically developing (ND-TD) controls and nondeleted subjects with psychotic symptoms (ND-PS). Pairwise probability maps depicting significant increases (blue) and decreases (red/yellow) in several morphological measures. There were no significant differences between 22q11DS subjects with and without psychotic symptoms. Statistical maps for each hemisphere are first masked at  $p_{\text{FDR}}=0.05$  and then displayed at an uncorrected threshold of  $1.3 < -\log(p) < 4$  for consistency. FDR, false discovery rate.

## VOLUME

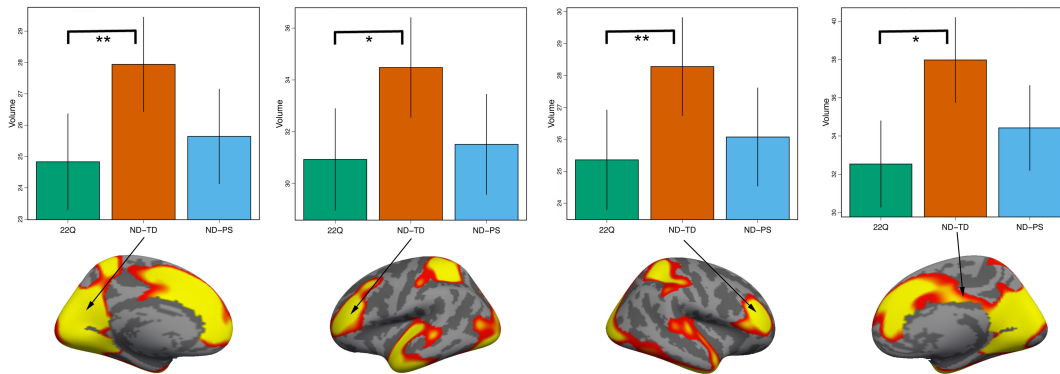

## SURFACE AREA

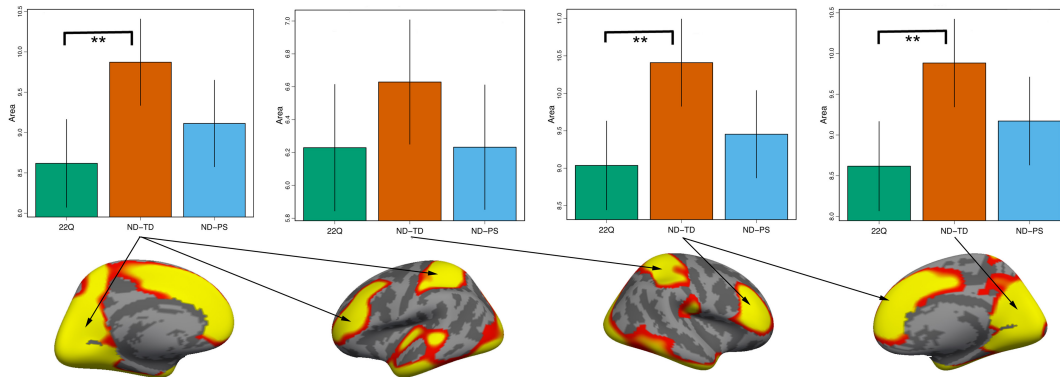

## GYRIFICATION INDEX

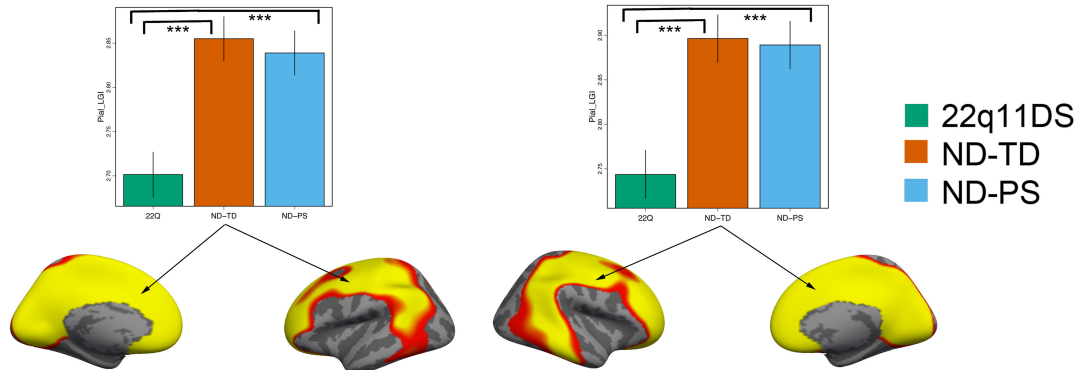

**Figure S2.** Regional group differences in cerebral volume, surface area, and local gyrification index. Brain maps show significant vertices (global  $p < 0.05$ ) as determined via cluster threshold models. Plots demonstrate mean group differences for each significant cluster. Vertical lines represent 95% confidence intervals for each group. Significant 2-way group differences are displayed with brackets (adjusted  $p$  values; \*\*\*  $< 0.0001$ ; \*\*  $< 0.01$ , \*  $< 0.05$ ).
